# Supplementary material for: Biomarker analysis to predict the pathological response to neoadjuvant chemotherapy in locally advanced gastric cancer: An exploratory biomarker study of COMPASS, a randomized phase II trial
Source: PubMed Central journal article supplement (PMC7392622; doi:10.18632/oncotarget.27658), 2020-07-28
Supplement: oncotarget-11-2906-s001.pdf [file oncotarget-11-2906-s001.pdf]

## Biomarker analysis to predict the pathological response to neoadjuvant chemotherapy in locally advanced gastric cancer: An exploratory biomarker study of COMPASS, a randomized phase II trial

### SUPPLEMENTARY MATERIALS

**Supplementary Table 1: The relation between the expression levels of 127 genes and pathological response to either SC or PC. See Supplementary Table 1**

**Supplementary Table 2: Relation between mRNA expression and clinicopathological features (biomarker analysis cohort,  $n = 46$ )**

| Variables/categories | <i>ZDHHC14</i>               |                           |                 | <i>TIMP1</i>                 |                               |                 | <i>CLDN18.2</i>               |                              |                 |
|----------------------|------------------------------|---------------------------|-----------------|------------------------------|-------------------------------|-----------------|-------------------------------|------------------------------|-----------------|
|                      | $\geq 0.608$<br>( $n = 31$ ) | $< 0.608$<br>( $n = 15$ ) | <i>P</i> -value | $\geq 10.473$<br>( $n = 8$ ) | $\geq 10.473$<br>( $n = 38$ ) | <i>P</i> -value | $\geq 23.564$<br>( $n = 18$ ) | $< 23.564$<br>( $n = 28$ )   | <i>P</i> -value |
| Age (years)          |                              |                           |                 |                              |                               |                 |                               |                              |                 |
| < 67                 | 20                           | 8                         | 0.4463          | 2                            | 26                            | 0.0022          | 9                             | 9                            | 0.2258          |
| $\geq 67$            | 11                           | 7                         |                 | 6                            | 12                            |                 | 9                             | 19                           |                 |
| Gender               |                              |                           |                 |                              |                               |                 |                               |                              |                 |
| Male                 | 22                           | 11                        | 0.8673          | 1                            | 11                            | 0.3356          | 13                            | 21                           | 0.8341          |
| Female               | 9                            | 4                         |                 | 7                            | 27                            |                 | 5                             | 7                            |                 |
| Histologic type      |                              |                           |                 |                              |                               |                 |                               |                              |                 |
| Differentiated       | 13                           | 5                         | 0.5752          | 3                            | 15                            | 0.9172          | 7                             | 11                           | 0.9785          |
| Undifferentiated     | 18                           | 10                        |                 | 5                            | 23                            |                 | 11                            | 17                           |                 |
| Variables/categories | <i>EGFR</i>                  |                           |                 | <i>RRM1</i>                  |                               |                 | <i>MUC2</i>                   |                              |                 |
|                      | $\geq 0.549$<br>( $n = 21$ ) | $< 0.549$<br>( $n = 25$ ) | <i>P</i> -value | $\geq 0.803$<br>( $n = 12$ ) | $< 0.803$<br>( $n = 34$ )     | <i>P</i> -value | $\geq 14.04$<br>( $n = 9$ )   | $\geq 14.04$<br>( $n = 37$ ) | <i>P</i> -value |
| Age (years)          |                              |                           |                 |                              |                               |                 |                               |                              |                 |
| < 67                 | 13                           | 15                        | 0.8951          | 5                            | 23                            | 0.1129          | 4                             | 24                           | 0.2603          |
| $\geq 67$            | 8                            | 10                        |                 | 7                            | 11                            |                 | 5                             | 13                           |                 |
| Gender               |                              |                           |                 |                              |                               |                 |                               |                              |                 |
| Male                 | 16                           | 18                        | 0.7472          | 8                            | 26                            | 0.5061          | 5                             | 29                           | 0.162           |
| Female               | 5                            | 7                         |                 | 4                            | 8                             |                 | 4                             | 8                            |                 |
| Histologic type      |                              |                           |                 |                              |                               |                 |                               |                              |                 |
| Differentiated       | 9                            | 9                         | 0.9172          | 6                            | 12                            | 0.3695          | 3                             | 15                           | 0.6911          |
| Undifferentiated     | 12                           | 16                        |                 | 6                            | 22                            |                 | 6                             | 22                           |                 |
| Variables/categories | <i>DSG2</i>                  |                           |                 |                              |                               |                 |                               |                              |                 |
|                      | $\geq 4.312$<br>( $n = 24$ ) | $< 4.312$<br>( $n = 22$ ) | <i>P</i> -value |                              |                               |                 |                               |                              |                 |
| Age (years)          |                              |                           |                 |                              |                               |                 |                               |                              |                 |
| < 67                 | 9                            | 19                        | 0.2258          |                              |                               |                 |                               |                              |                 |
| $\geq 67$            | 9                            | 9                         |                 |                              |                               |                 |                               |                              |                 |
| Gender               |                              |                           |                 |                              |                               |                 |                               |                              |                 |
| Male                 | 13                           | 22                        | 0.6222          |                              |                               |                 |                               |                              |                 |
| Female               | 5                            | 6                         |                 |                              |                               |                 |                               |                              |                 |
| Histologic type      |                              |                           |                 |                              |                               |                 |                               |                              |                 |
| Differentiated       | 7                            | 11                        | 0.9785          |                              |                               |                 |                               |                              |                 |
| Undifferentiated     | 11                           | 17                        |                 |                              |                               |                 |                               |                              |                 |

**Supplementary Table 3: Relation between mRNA expression and clinicopathological features in pStage II/III gastric cancer (different cohort,  $n = 253$ ). See Supplementary Table 3**
